# Supplementary material for: Uncontrolled Extensions of Clinical Trials and the Use of External Controls—Scoping Opportunities and Methods
Source: PubMed Central journal article supplement — Clin Pharmacol Ther. 2021 Aug 10;111(1):187–99. doi: 10.1002/cpt.2346 (PMC9290853; doi:10.1002/cpt.2346), 2021-08-10
Supplement: CPT-111-187-s001.pdf [file CPT-111-187-s001.pdf]

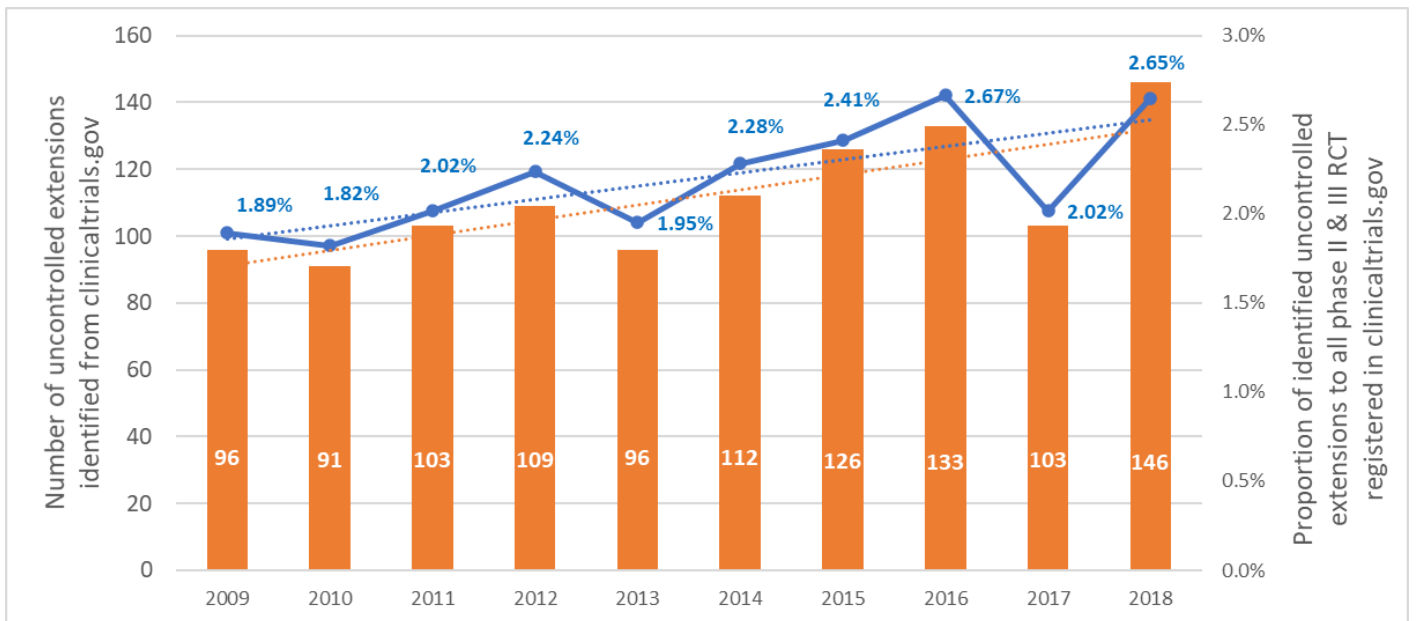

Figure S2. Number of uncontrolled extensions identified from clinicaltrials.gov (orange bar) and the proportion of identified uncontrolled extensions to all phase II & III RCT registered in clinicaltrials.gov (blue line) between 2009 to 2019. Note that 2009 represents the time span from 05/14/2009 to 05/14/2010, 2010 represents the time span from 05/15/2010 to 05/14/2011 and so on. Studies were assigned to years based on study start date. The dotted line is the fitted ordinary least squares (OLS) linear regression line with a slope of 4.5 studies per year (orange bar) and 0.07% increase in proportion per year (blue line).
