# Supplementary figures and images for: Uncontrolled Extensions of Clinical Trials and the Use of External Controls—Scoping Opportunities and Methods
Source: PubMed Central journal article supplement — Clin Pharmacol Ther. 2021 Aug 10;111(1):187–99. doi: 10.1002/cpt.2346 (PMC9290853; doi:10.1002/cpt.2346), 2021-08-10

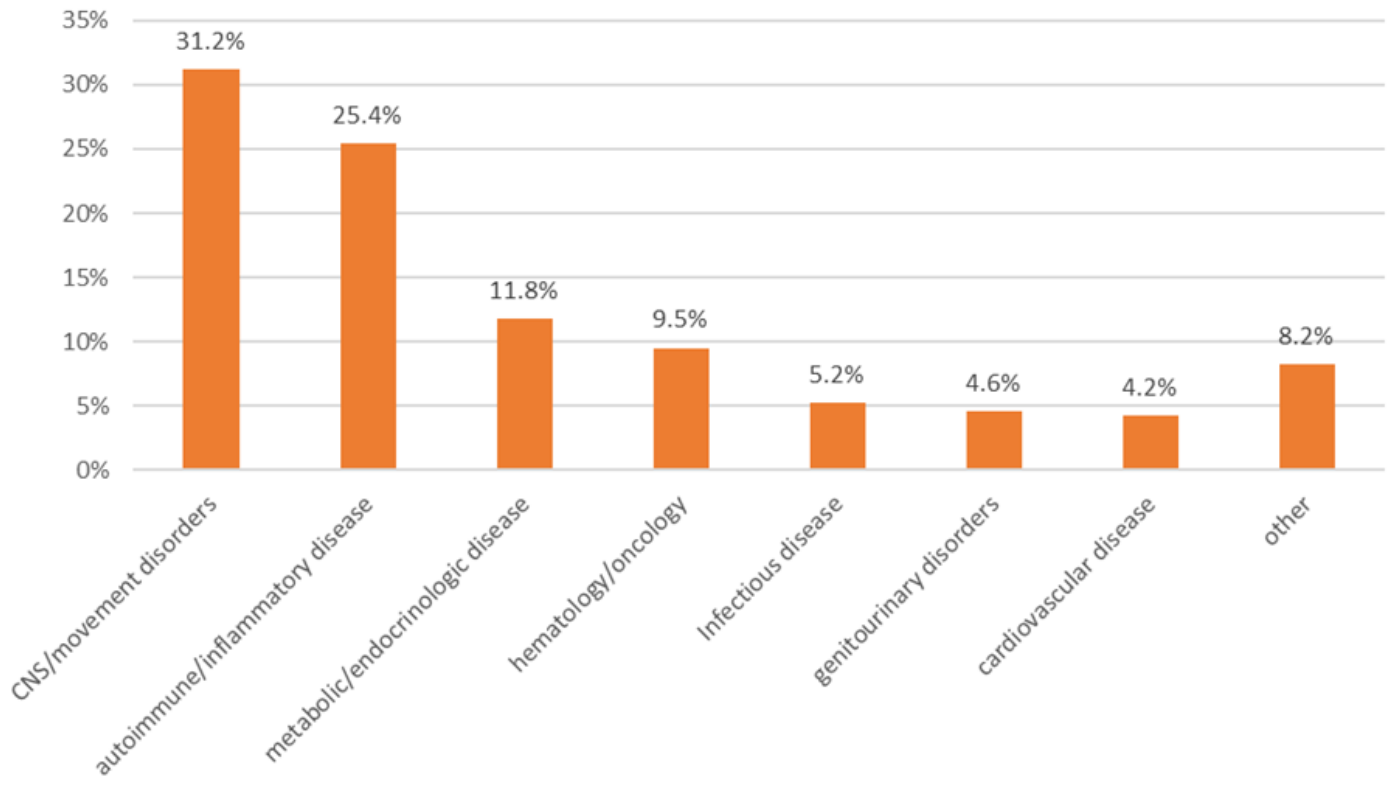

Figure S1. Therapeutic area of uncontrolled extensions.

Supplement: CPT-111-187-s002.pdf [file CPT-111-187-s002.pdf]
